# Supplementary material
Source: Research Square preprint supplement (doi:10.21203/rs.3.rs-9140363/v1)
Supplement: Supplementary file 1 [file 0a51c8e0dfeea42968355581.docx]

**Supplement Table S1.** *Multi-language overview for instruments used in the MAKO study.*

| **Instrument Name** | **German** | **English** | **Turkish** | **Russian** | **Ukrainian** |
| --- | --- | --- | --- | --- | --- |
| **Sociodemographic** |  |  |  |  |  |
| Client Service Receipt Inventory (CSRI) – adapted | (Roick et al., 2001) | (Chisholm et al., 2000)  C1 (few additional response options) | B1 | B1 | B1 |
| Familial risk, adapted | (Schick et al., 2021) | C1 | B1 | B1 | B1 |
| **Mental health, cognition and behavior** |  |  |  |  |  |
| *Interview* |  |  |  |  |  |
| Structured Clinical Interview for DSM-5: Clinician Version (SCID-5-CV) | (Beesdo-Baum et al., 2019a) | (First, Williams, Karg, et al., 2016) | (Elbir et al., 2019) | B1 | X |
| Structured Clinical Interview for DSM-5: Personality Disorders (SCID-5-PD) | (Beesdo-Baum et al., 2019b) | (First, Williams, Benjamin, et al., 2016) | (Bayad et al., 2021) | B1 | X |
| Operational Criteria Checklist for Psychotic Illness and Affective Illness (OPCRIT-4), adapted for DSM-5 | Self created three additional items | (McGuffin et al., 1991)  C1* | B1* | B1* | X |
| Comprehensive Assessment of At-Risk Mental States (CAARMS) | unknown | (Yung et al., 2005) | (Yokuşoğlu et al., 2020) | B2 | X |
| Quick Inventory of Depressive Symptomatology (Clinician-Rated) (QIDS-C) | (Dafsari et al., 2023) | X (rated in German) | X (rated in German) | X (rated in German) | X (rated in German) |
| Affective Disorders Evaluation (ADE) | C2 | (Sachs, 1990; Sachs et al., 2003) | C1 | B1 | X |
| Social and Occupational Functioning Assessment Scale (SOFAS) | (Schaub & Juckel, 2011) | (Morosini et al., 2000) | B1 | B1 | X |
| *Self-report* |  |  |  |  |  |
| Hierarchical Taxonomy of Psychopathology (HiTOP) | (Zimmermann et al., 2024) | (Simms, 2023) | B2 | X | X |
| Medication (based on CSRI-adapted) | (Roick et al., 2001) | (Chisholm et al., 2000) | B1 | B1 | B1 |
| Kessler Distress Scale (K10) | (Giesinger et al., 2008) | (Kessler et al., 2002) | (Altun et al., 2019) | (Puac-Polanco et al., 2023) | B1 |
| Prodromal Questionnaire 16 (PQ-16) | (Sengutta et al., 2019) | (Ising et al., 2012) | B2 | B1 | B1 |
| Hypomania Checklist 32 (HCL-32) | (Meyer et al., 2007) | (Angst et al., 2005) | B2 | B1 | B1 |
| Difficulties in Emotion Regulation Scale - Short Form (DERS-SF) | (Ehring et al., 2008) | (Kaufman et al., 2016) | B2 | B1 | B1 |
| WSAS (modified) | (Heissel et al., 2021) | (Mundt et al., 2002) | B2 | B1 | B1 |
| Cognitive Emotional Regulation Questionnaire (CERQ) | (Loch et al., 2011) | (Garnefski & Kraaij, 2006) C1 additional items 19-20 | B1 | X | X |
| Personality Inventory for DSM-5- Brief Form Plus (PID-5-BF+) | (Bach et al., 2020; Kerber et al., 2022) | (Bach et al., 2020; Kerber et al., 2022) | (Çökmüş et al., 2018) | X | X |
| Level of Personality Functioning Scale-Brief Form 2.0 (LPFS-BF 2.0) | (Spitzer et al., 2021) | (Bach & Hutsebaut, 2018) | B2 | X | X |
| Connor-Davidson Resilience Scale (CD-RISC) | (Sarubin et al., 2015) | (Connor & Davidson, 2003) | (Karaırmak, 2010) | X | X |
| Three-Item Loneliness Scale | (Röhr et al., 2020) | (Hughes et al., 2004) | B2 | X | X |
| Multidimensional Scale of Perceived Social Support (F-sozU) | (Kliem et al., 2015) | (Kliem et al., 2015) | (Yıldırım & Tanrıverdi, 2021) | X | X |
| General Self Efficacy Scale (GSE) | (Schwarzer et al., 1997) | (Schwarzer & Jerusalem, 1995) | (Aypay, 2010) | X | X |
| Warwick-Edinburgh Mental Well-being Scale (WEMWBS) | (Lang & Bachinger, 2017) | (Tennant et al., 2007) | (Kayis et al., 2022) | (Robinson et al., 2013) | X |
| World Health Organization Quality of Life (WHO-QoLBref) | (Whoqol Group, 1998) | (Whoqol Group, 1998) | (Whoqol Group, 1998) | (Whoqol Group, 1998) | (Whoqol Group, 1998) |
| Subjective Happiness Scale (SHS) | (Swami et al., 2009) | (Lyubomirsky & Lepper, 1999) | (Dogan & Totan, 2013) | (Lyubomirsky & Lepper, 1999) | X |
| MyLifeTracker | AA | (Kwan et al., 2018) | X | X | X |
| Climate Change Related Distress and Impairment Scale (CC-DIS) | (Hepp et al., 2023) | (Hepp et al., 2023) | B2 | X | X |
| Pro-Environmental Behaviours Measure, adaptedadapted | A2 with modifications | C1 (modifications from original scale – Stanley et al., 2021) | B1 | X | X |
| **Help-seeking and service use** |  |  |  |  |  |
| *Interview* |  |  |  |  |  |
| Nottingham Onset Schedule – adapted | C2 and modified (extension towards disorders other than psychotic) | X  (completed in German version)  (Singh et al., 2005) | X (completed in German version) | X  (completed in German version) | X (completed in German version) |
| *Self-report* |  |  |  |  |  |
| Pathways to Care; adapted | Self-created | (Morgan et al., 2005) and C1 (modifications) | B1 | X | X |
| Trust in mental health professionals and science | Self-created | C1 | B1 | X | X |
| Current help-seeking self-report | Self-created | C1 | B1 | B1 | B1 |
| Barriers to Access to Care Evaluation (BACE) | A2 | (Clement et al., 2012) | B2 | X | X |
| General Help Seeking Questionnaire (GHSQ) | A2 | (Wilson et al., 2005) | B2 | X | X |
| Attitudes Toward Seeking Professional Psychological Help - Revised (ATSPPH-SF) | (Coppens et al., 2013) | (Picco et al., 2016) | B2 | X | X |
| **Environmental exposures** |  |  |  |  |  |
| Childhood trauma questionnaire (CTQ) | (Wingenfeld et al., 2010) | (Bernstein et al., 2003) | (Şar et al., 2021; Sar et al., 2012) | X | X |
| Retrospective Bullying Questionnaire (RBQ) | A2 | (Schäfer et al., 2004), modified in EU-GEI (Gayer-Anderson et al., 2020) | B2 | X | X |
| Major Experiences of Discrimination | A2 | (Williams et al., 1997) | B2 | X | X |
| Everyday Discrimination Scale (EDS) | Ulusoy et al., 2023  A2 for one item and scale | ( Williams et al., 1997) | B2 | X | X |
| Life Transitions | Self-created | C1 | B1 | X | X |
| Transitional Impact Scale (TIS-12) | A2 | (Svob et al., 2014) | B2 | X | X |
| Hierarchical Taxonomy of Psychopathology – substance use module (HiTOP-SUD) | Translation procedure described in (Zimmermann et al., 2024) | (Simms, 2023) | B2 | X | X |
| McArthur Scale of Subjective Social Status | (Hoebel et al., 2015) | (Adler et al., 2000) | B1 | B1 | B1 |

Notes.

AA = forward-backward translation: multidisciplinary committee of youth and native speakers conducting forward and backward-translations, expert reviews and comprehensibility testing

A = forward-backward-translation: forward-translated by study team and back-translation from professional translator and then compared/optimized

B = translation by professional translators, then review and consensus by team members with Turkish/Russian/Ukrainian as native language

C = translation and consensus within study team

x = not translated/not implemented

* = OPCRIT translation of 3 items for interview use

1 = from German to target language

2 = from English to target language

**References**

Adler, N. E., Epel, E. S., Castellazzo, G., & Ickovics, J. R. (2000). Relationship of subjective and objective social status with psychological and physiological functioning: Preliminary data in healthy, White women. *Health Psychology*, *19*(6), 586–592. https://doi.org/10.1037/0278-6133.19.6.586

Angst, J., Adolfsson, R., Benazzi, F., Gamma, A., Hantouche, E., Meyer, T., Skeppar, P., Vieta, E., & Scott, J. (2005). The HCL-32: Towards a self-assessment tool for hypomanic symptoms in outpatients. *Journal of Affective Disorders*, *88*(2), 217–233. https://doi.org/10.1016/j.jad.2005.05.011

Bach, B., Kerber, A., Aluja, A., Bastiaens, T., Keeley, J. W., Claes, L., Fossati, A., Gutierrez, F., Oliveira, S. E., & Pires, R. (2020). International assessment of DSM-5 and ICD-11 personality disorder traits: Toward a common nosology in DSM-5.1. *Psychopathology*, *53*(3–4), 179–188.

Beesdo-Baum, K., Zaudig, M., & Wittchen, H.-U. (2019a). *SCID-5-CV: strukturiertes klinisches Interview für DSM-5-Störungen-Klinische Version: Deutsche Bearbeitung des Structured Clinical Interview for DSM-5 Disorders-Clinician version von Michael B. First, Janet BW Williams, Rhonda S. Karg, Robert L. Spitzer*. Hogrefe.

Beesdo-Baum, K., Zaudig, M., & Wittchen, H.-U. (2019b). *SCID-5-PD: Strukturiertes Klinisches Interview für DSM-5®-Persönlichkeitsstörungen*. Hogrefe.

Bernstein, D. P., Stein, J. A., Newcomb, M. D., Walker, E., Pogge, D., Ahluvalia, T., Stokes, J., Handelsman, L., Medrano, M., & Desmond, D. (2003). Development and validation of a brief screening version of the Childhood Trauma Questionnaire. *Child abuse & neglect*, *27*(2), 169–190.

Chisholm, D., Knapp, M. R. J., Knudsen, H. C., Amaddeo, F., Gaite, L., Van Wijngaarden, B. O. B., & EPSILON Study Group. (2000). Client socio-demographic and service receipt inventory–European version: Development of an instrument for international research: EPSILON Study 5. *The British Journal of Psychiatry*, *177*(S39), s28–s33.

Clement, S., Brohan, E., Jeffery, D., Henderson, C., Hatch, S. L., & Thornicroft, G. (2012). Development and psychometric properties the Barriers to Access to Care Evaluation scale (BACE) related to people with mental ill health. *BMC psychiatry*, *12*, 1–11.

Connor, K. M., & Davidson, J. R. (2003). Development of a new resilience scale: The Connor‐Davidson resilience scale (CD‐RISC). *Depression and anxiety*, *18*(2), 76–82.

Coppens, E., Van Audenhove, C., Scheerder, G., Arensman, E., Coffey, C., Costa, S., Koburger, N., Gottlebe, K., Gusmão, R., O’Connor, R., Postuvan, V., Sarchiapone, M., Sisask, M., Székely, A., van der Feltz - Cornelis, C., & Hegerl, U. (2013). Public attitudes toward depression and help-seeking in four European countries baseline survey prior to the OSPI-Europe intervention. *Journal of Affective Disorders*, *150*(2), 320–329. https://doi.org/10.1016/j.jad.2013.04.013

Dafsari, F., Bewernick, B., Boehringer, S., Domschke, K., Elsaesser, M., Löbner, M., Luppa, M., Preis, L., Püsken, J., Schmitt, S., Szekely, A.-J., Hellmich, M., Mueller, W., Wagner, M., Peters, O., Frölich, L., Riedel-Heller, S., Schramm, E., Hautzinger, M., & Jessen, F. (2023). Psychotherapy and Psychosomatics Standard Research Article Cognitive Behavioral Therapy for Late-Life Depression (CBTlate): Results of a Multicenter, Randomized, Observer-Blinded, Controlled Trial. *Psychotherapy and Psychosomatics*. https://doi.org/10.1159/000529445

Ehring, T., Fischer, S., Schnülle, J., Bösterling, A., & Tuschen-Caffier, B. (2008). Characteristics of emotion regulation in recovered depressed versus never depressed individuals. *Personality and Individual Differences*, *44*(7), 1574–1584. https://doi.org/10.1016/j.paid.2008.01.013

First, M. B., Williams, J. B., Benjamin, L. S., & Spitzer, R. L. (2016). *User’s Guide for the SCID-5-PD Structured Clinical Interview for DSM-5 Personality Disorders: Also Contains Instructions for the Structured Clinical Interview for DSM-5 Screening Personality Questionnaire*. American Psychiatric Association Publishing.

First, M. B., Williams, J. B., Karg, R. S., & Spitzer, R. L. (2016). SCID-5-CV: Structured clinical interview for DSM-5 disorders: Clinician version. *(No Title)*.

Garnefski, N., & Kraaij, V. (2006). Cognitive emotion regulation questionnaire–development of a short 18-item version (CERQ-short). *Personality and individual differences*, *41*(6), 1045–1053.

Giesinger, J., Rumpold, Mag. G., & Schüßler, G. (2008). Die K10-Screening-Skala für unspezifischen psychischen Distress. *Psychosomatik und Konsiliarpsychiatrie*, *2*(2), 104–111. https://doi.org/10.1007/s11800-008-0100-x

Heissel, A., Bollmann, J., Kangas, M., Abdulla, K., Rapp, M., & Sanchez, A. (2021). Validation of the German version of the work and social adjustment scale in a sample of depressed patients. *BMC health services research*, *21*(1), 593.

Hepp, J., Klein, S. A., Horsten, L. K., Urbild, J., & Lane, S. P. (2023). Introduction and behavioral validation of the climate change distress and impairment scale. *Scientific Reports*, *13*(1), Article 1. https://doi.org/10.1038/s41598-023-37573-4

Hoebel, J., Müters, S., Kuntz, B., Lange, C., & Lampert, T. (2015). Measuring subjective social status in health research with a German version of the MacArthur Scale. *Bundesgesundheitsblatt - Gesundheitsforschung - Gesundheitsschutz*, *58*(7), 749–757. https://doi.org/10.1007/s00103-015-2166-x

Hughes, M. E., Waite, L. J., Hawkley, L. C., & Cacioppo, J. T. (2004). A short scale for measuring loneliness in large surveys: Results from two population-based studies. *Research on aging*, *26*(6), 655–672.

Kaufman, E. A., Xia, M., Fosco, G., Yaptangco, M., Skidmore, C. R., & Crowell, S. E. (2016). The Difficulties in Emotion Regulation Scale Short Form (DERS-SF): Validation and replication in adolescent and adult samples. *Journal of psychopathology and behavioral assessment*, *38*, 443–455.

Kerber, A., Schultze, M., Müller, S., Rühling, R. M., Wright, A. G., Spitzer, C., Krueger, R. F., Knaevelsrud, C., & Zimmermann, J. (2022). Development of a short and ICD-11 compatible measure for DSM-5 maladaptive personality traits using ant colony optimization algorithms. *Assessment*, *29*(3), 467–487.

Kessler, R. C., Andrews, G., Colpe, L. J., Hiripi, E., Mroczek, D. K., Normand, S.-L., Walters, E. E., & Zaslavsky, A. M. (2002). Short screening scales to monitor population prevalences and trends in non-specific psychological distress. *Psychological Medicine*, *32*(6), 959–976.

Kliem, S., Mößle, T., Rehbein, F., Hellmann, D. F., Zenger, M., & Brähler, E. (2015). A brief form of the Perceived Social Support Questionnaire (F-SozU) was developed, validated, and standardized. *Journal of clinical epidemiology*, *68*(5), 551–562.

Kwan, B., Rickwood, D. J., & Telford, N. R. (2018). Development and validation of MyLifeTracker: A routine outcome measure for youth mental health. *Psychology Research and Behavior Management*, *11*, 67–77. https://doi.org/10.2147/PRBM.S152342

Lang, G., & Bachinger, A. (2017). Validation of the German Warwick-Edinburgh Mental Well-Being Scale (WEMWBS) in a community-based sample of adults in Austria: A bi-factor modelling approach. *Journal of Public Health*, *25*(2), 135–146. https://doi.org/10.1007/s10389-016-0778-8

Loch, N., Hiller, W., & Witthöft, M. (2011). Der Cognitive Emotion Regulation Questionnaire (CERQ): Erste teststatistische Überprüfung einer deutschen Adaption. *Zeitschrift für Klinische Psychologie und Psychotherapie*, *40*(2), 94–106. https://doi.org/10.1026/1616-3443/a000079

Lyubomirsky, S., & Lepper, H. S. (1999). A measure of subjective happiness: Preliminary reliability and construct validation. *Social indicators research*, *46*, 137–155.

McGuffin, P., Farmer, A., & Harvey, I. (1991). A polydiagnostic application of operational criteria in studies of psychotic illness: Development and reliability of the OPCRIT system. *Archives of general psychiatry*, *48*(8), 764–770.

Meyer, T. D., Hammelstein, P., Nilsson, L.-G., Skeppar, P., Adolfsson, R., & Angst, J. (2007). The Hypomania Checklist (HCL-32): Its factorial structure and association to indices of impairment in German and Swedish nonclinical samples. *Comprehensive psychiatry*, *48*(1), 79–87.

Morosini, P. L., Magliano, L., Brambilla, L. al, Ugolini, S., & Pioli, R. (2000). Development, reliability and acceptability of a new version of the DSM‐IV Social and Occupational Functioning Assessment Scale (SOFAS) to assess routine social funtioning. *Acta Psychiatrica Scandinavica*, *101*(4), 323–329.

Mundt, J. C., Marks, I. M., Shear, M. K., & Greist, J. M. (2002). The Work and Social Adjustment Scale: A simple measure of impairment in functioning. *British Journal of Psychiatry*, *180*(5), 461–464. https://doi.org/10.1192/bjp.180.5.461

Picco, L., Abdin, E., Chong, S. A., Pang, S., Shafie, S., Chua, B. Y., Vaingankar, J. A., Ong, L. P., Tay, J., & Subramaniam, M. (2016). Attitudes toward seeking professional psychological help: Factor structure and socio-demographic predictors. *Frontiers in psychology*, *7*, 547.

Röhr, S., Reininghaus, U., & Riedel-Heller, S. G. (2020). Mental wellbeing in the German old age population largely unaltered during COVID-19 lockdown: Results of a representative survey. *BMC geriatrics*, *20*(1), 489.

Roick, C., Kilian, R., Matschinger, H., Bernert, S., Mory, C., & Angermeyer, M. C. (2001). Die deutsche Version des Client Sociodemographic and Service Receipt Inventory. *Psychiatrische Praxis*, *28*, 84–90. https://doi.org/10.1055/s-2001-17790

Sachs, G. S. (1990). Use of clonazepam for bipolar affective disorder. *The Journal of clinical psychiatry*, *51*, 31–34; discussion 50.

Sachs, G. S., Thase, M. E., Otto, M. W., Bauer, M., Miklowitz, D., Wisniewski, S. R., Lavori, P., Lebowitz, B., Rudorfer, M., & Frank, E. (2003). Rationale, design, and methods of the systematic treatment enhancement program for bipolar disorder (STEP-BD). *Biological psychiatry*, *53*(11), 1028–1042.

Sarubin, N., Gutt, D., Giegling, I., Bühner, M., Hilbert, S., Krähenmann, O., Wolf, M., Jobst, A., Sabaß, L., Rujescu, D., Falkai, P., & Padberg, F. (2015). Erste Analyse der psychometrischen Eigenschaften und Struktur der deutschsprachigen 10- und 25-Item Version der Connor-Davidson Resilience Scale (CD-RISC). *Zeitschrift für Gesundheitspsychologie*. https://econtent.hogrefe.com/doi/10.1026/0943-8149/a000142

Schäfer, M., Korn, S., Smith, P. K., Hunter, S. C., Mora‐Merchán, J. A., Singer, M. M., & Van der Meulen, K. (2004). Lonely in the crowd: Recollections of bullying. *British Journal of Developmental Psychology*, *22*(3), 379–394.

Schaub, D., & Juckel, G. (2011). PSP-Skala – Deutsche Version der Personal and Social Performance Scale. *Der Nervenarzt*, *82*(9), 1178–1184. https://doi.org/10.1007/s00115-010-3204-4

Schick, A., Paetzold, I., Rauschenberg, C., Hirjak, D., Banaschewski, T., Meyer-Lindenberg, A., Boehnke, J. R., Boecking, B., & Reininghaus, U. (2021). Effects of a Novel, Transdiagnostic, Hybrid Ecological Momentary Intervention for Improving Resilience in Youth (EMIcompass): Protocol for an Exploratory Randomized Controlled Trial. *JMIR Research Protocols*, *10*(12), e27462. https://doi.org/10.2196/27462

Schwarzer, R., Bäßler, J., Kwiatek, P., Schröder, K., & Zhang, J. X. (1997). The Assessment of Optimistic Self-beliefs: Comparison of the German, Spanish, and Chinese Versions of the General Self-efficacy Scale. *Applied Psychology*, *46*(1), 69–88. https://doi.org/10.1111/j.1464-0597.1997.tb01096.x

Schwarzer, R., & Jerusalem, M. (1995). Generalized self-efficacy scale. *J. Weinman, S. Wright, & M. Johnston, Measures in health psychology: A user’s portfolio. Causal and control beliefs*, *35*(37), 82–003.

Sengutta, M., Gaweda, Ł., Moritz, S., & Karow, A. (2019). The mediating role of borderline personality features in the relationship between childhood trauma and psychotic-like experiences in a sample of help-seeking non-psychotic adolescents and young adults. *European Psychiatry*, *56*, 84–90.

Simms, L. (2023). Introduction of Self-Report Measures of the HiTOP Model: Reliability and Structural Validity of the HiTOP-SR. *2023 SPA Convention and Workshops*.

Spitzer, C., Müller, S., Kerber, A., Hutsebaut, J., Brähler, E., & Zimmermann, J. (2021). Die deutsche Version der Level of Personality Functioning Scale-Brief Form 2.0 (LPFS-BF): Faktorenstruktur, konvergente Validität und Normwerte in der Allgemeinbevölkerung. *PPmP - Psychotherapie · Psychosomatik · Medizinische Psychologie*, *71*, 284–293. https://doi.org/10.1055/a-1343-2396

Svob, C., Brown, N. R., Reddon, J. R., Uzer, T., & Lee, P. J. (2014). The transitional impact scale: Assessing the material and psychological impact of life transitions. *Behavior Research Methods*, *46*, 448–455.

Swami, V., Stieger, S., Voracek, M., Dressler, S. G., Eisma, L., & Furnham, A. (2009). Psychometric evaluation of the Tagalog and German subjective happiness scales and a cross-cultural comparison. *Social Indicators Research*, *93*(2), Article 2. https://doi.org/10.1007/s11205-008-9331-7

Tennant, R., Hiller, L., Fishwick, R., Platt, S., Joseph, S., Weich, S., Parkinson, J., Secker, J., & Stewart-Brown, S. (2007). The Warwick-Edinburgh mental well-being scale (WEMWBS): Development and UK validation. *Health and Quality of life Outcomes*, *5*, 1–13.

Whoqol Group. (1998). Development of the World Health Organization WHOQOL-BREF quality of life assessment. *Psychological Medicine*, *28*(3), 551–558.

Wilson, C. J., Deane, F. P., Ciarrochi, J. V., & Rickwood, D. (2005). *Measuring help seeking intentions: Properties of the general help seeking questionnaire*.

Wingenfeld, K., Spitzer, C., Mensebach, C., Grabe, H. J., Hill, A., Gast, U., Schlosser, N., Höpp, H., Beblo, T., & Driessen, M. (2010). Die deutsche version des childhood trauma questionnaire (CTQ): Erste befunde zu den psychometrischen kennwerten. *PPmP-psychotherapie· psychosomatik· medizinische psychologie*, *60*(11), 442–450.

Yung, A. R., Yung, A. R., Pan Yuen, H., Mcgorry, P. D., Phillips, L. J., Kelly, D., Dell’Olio, M., Francey, S. M., Cosgrave, E. M., & Killackey, E. (2005). Mapping the onset of psychosis: The comprehensive assessment of at-risk mental states. *Australian & New Zealand Journal of Psychiatry*, *39*(11–12), 964–971.

Zimmermann, J., Wendt, L. P., Edelhoff, H., Wierzba, E., Fleck, L., Cicero, D. C., & Reininghaus, U. (2024). *Development and Initial Evaluation of the German Version of the Hierarchical Taxonomy of Psychopathology Self-Report (HiTOP-SR)*. OSF.
