# Supplementary material
Source: Research Square preprint supplement (doi:10.21203/rs.3.rs-9140363/v1)
Supplement: Supplementary file 2 [file 2a2e4011a3fc583dd1ac4ecc.docx]

**Table S2.** Guideline treatment definitions in the adapted Nottingham Onset Schedule used in the Mannheim incidence and inception cohort study, based on the German S3 guidelines of the German Association for Psychiatry, Psychotherapy and Psychosomatics (DGPPN)

| Diagnostic group | Guideline treatment |
| --- | --- |
| Psychotic disorders | Beginning of treatment with antipsychotic medication, maintained for at least one month (at least 75% compliance) or until significant response has been achieved, depending on which criterion is met first |
| Major depressive disorder | Beginning of treatment with anti-depressive medication / psychopharmaceuticals, maintained for at least two weeks or until significant response (e.g., Amitriptylin, Venlafaxin, (Es-)Citalopram, Sertralin, Duloxetin, Fluoxetin, Mirtazapin), or psychotherapy (e.g., (cognitive) behavioural therapy, Acceptance and Commitment Therapy, Cognitive Behavioral Analysis System of Psychotherapy, psychodynamic or psychanalytic therapy, systemic therapy) |
| Bipolar disorder | Beginning of treatment with phase prophylaxis / psychopharmaceuticals (e.g. Carbamazepin, Lithium, Aripiprazol, Asenapin, Olanzapin, Quetiapin, Valproat, Ziprasidon, Haloperidol), or psychotherapy for bipolar disorder (e.g. cognitive behavioral therapy, interactive group psychoeducation) |
| Borderline personality disorder | Beginning of treatment with specialized psychotherapy (cognitive behavioral therapy or psychodynamic therapy, specifically: Dialectical Behavioral Therapy, Mentalization Based Therapy, Psychoanalytic-Interactional Method, Schema Focused Therapy, Transference Focused Therapy) |
